# Supplementary material
Source: MDPI journal article supplement (https://www.mdpi.com/1099-4300/15/9/3810)
Supplement: s1 [file s1]

Note:

On page 3812, there is a typo in Equation (1).  $S_{\text{config}}$  should be  $S_{\sigma}$ . The corrected Equation (1) is listed as below:

$$S_{\sigma} / k_{\text{B}} = \left\{ \frac{3}{2}(\zeta - 1)y_1 + \frac{3}{2}(\zeta - 1)^2 y_2 - \left[ \frac{1}{2}(\zeta - 1)(\zeta - 3) + \ln \zeta \right] (1 - y_3) \right\} \quad (1)$$
